# Supplementary material
Source: PubMed Central journal article supplement (PMC3707529)
Supplement: supp_pp.113.217984_217984Figure_S1.pdf [file supp_pp.113.217984_217984Figure_S1.pdf]

A

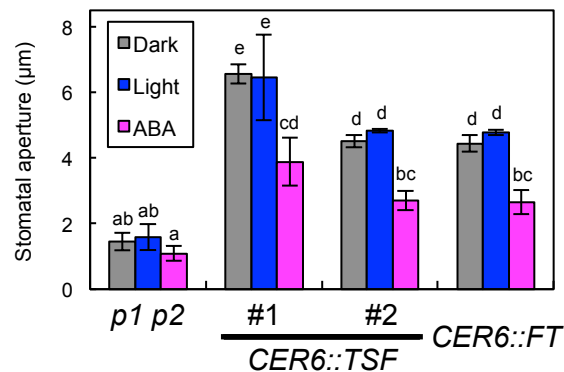

B

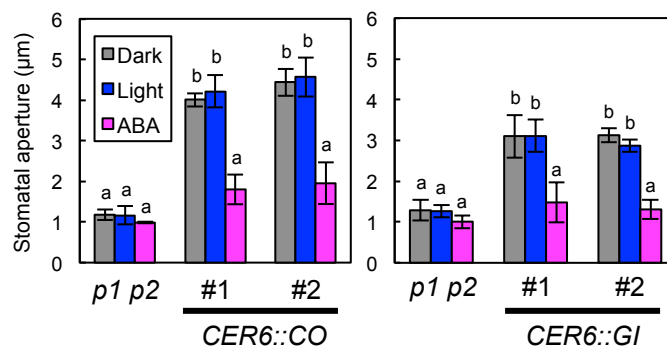

**Supplemental Figure S1.** The stomata in *GI*-, *CO*-, *TSF*-, or *FT*- overexpressing plants showed ABA-induced stomatal closure. A, ABA-induced stomatal closure in *TSF*- and *FT*-transgenic plants. Epidermal fragments were kept in the dark (Dark) or illuminated with  $10 \mu\text{mol m}^{-2} \text{s}^{-1}$  blue light under a background  $50 \mu\text{mol m}^{-2} \text{s}^{-1}$  red light (Light) for 3 h. The epidermis was treated with  $20 \mu\text{M}$  ABA under light-exposure conditions for 3 h (ABA). Experiments were performed simultaneously with the same experiments shown in Figure 1F. Data represent the means of three independent experiments with standard deviations (SDs). Different letters indicate significant differences among means ( $P < 0.05$ ; Tukey's test). B, ABA-induced stomatal closure in *CO*- and *GI*-transgenic plants. Experimental conditions are the same as in A. Experiments were performed simultaneously with the same experiments shown in Figure 3C. Data represent the means of three independent experiments with SDs. Different letters indicate significant differences between the means of *p1 p2* and each transgenic plant ( $P < 0.05$ ; Tukey's test).
