# Supplementary material
Source: PubMed Central journal article supplement (PMC3707529)
Supplement: supp_pp.113.217984_217984Figure_S2.pdf [file supp_pp.113.217984_217984Figure_S2.pdf]

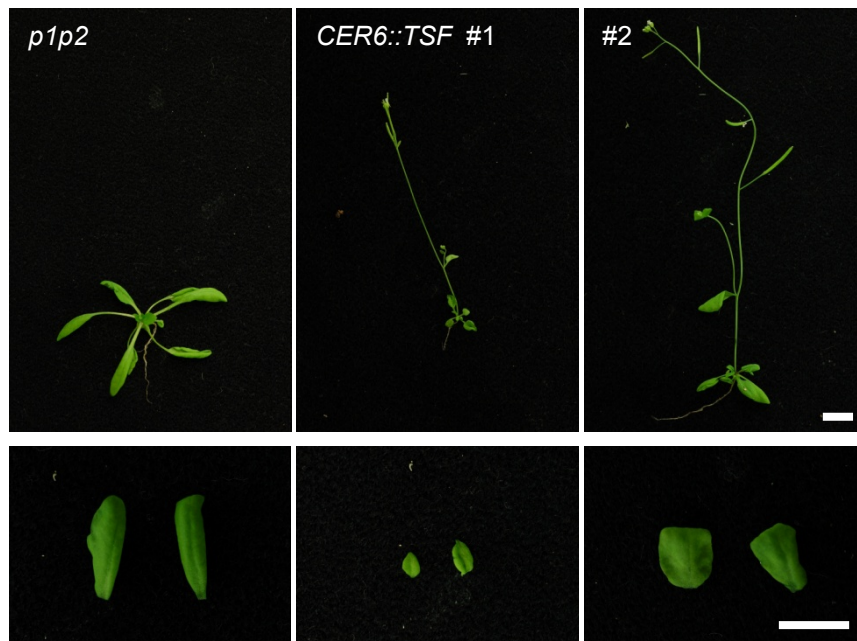

**Supplemental Figure S2.** Phenotypes of *phot1 phot2* (*p1 p2*) and *pCER6::TSF/p1 p2* plants. Four-week-old seedlings of *phot1 phot2* (*p1 p2*) and *pCER6::TSF/p1 p2* (*CER6::TSF*) under growth conditions (upper panel) and corresponding rosette leaves (lower panel). #, line number of transgenic plants. Scale bars represent 1 cm.
