# Supplementary material
Source: PubMed Central journal article supplement (PMC3707529)
Supplement: supp_pp.113.217984_217984Figure_S3.pdf [file supp_pp.113.217984_217984Figure_S3.pdf]

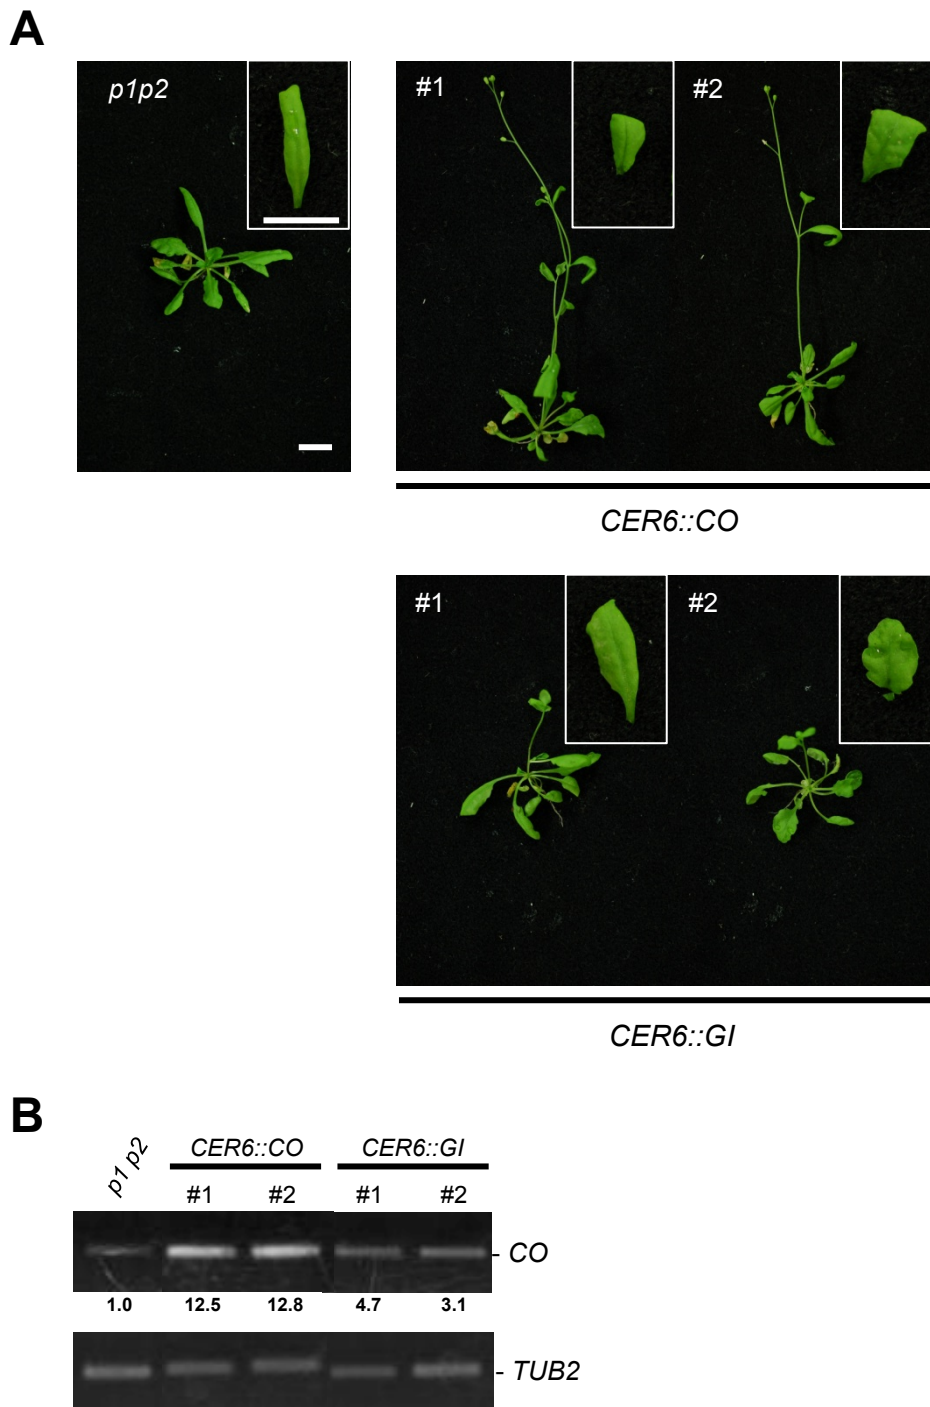

**Supplemental Figure S3.** Phenotypes of *phot1 phot2* (*p1 p2*), *pCER6::CO/p1 p2* (*CER6::CO*), and *pCER6::GI/p1 p2* (*CER6::GI*) plants. A, 5-week-old seedlings of *phot1 phot2* (*p1 p2*), *pCER6::CO/p1 p2* (*CER6::CO*), and *pCER6::GI/p1 p2* (*CER6::GI*) under growth conditions and corresponding rosette leaves (upper right panel). #, line number of transgenic plants. Scale bars represent 1 cm. B, RT-PCR analyses *CO* and *TUB2* in leaf epidermal fragments isolated at ZT12. The results indicate that *CO* transcription was promoted by the overexpression of *GI*. Thirty cycles of PCR were performed. Signal values are estimated as in Figure 1D.
