# Supplementary material
Source: PubMed Central journal article supplement (PMC3707529)
Supplement: supp_pp.113.217984_217984Table_S1.pdf [file supp_pp.113.217984_217984Table_S1.pdf]

**Supplemental Table S1.** List of transformation vectors.

| Vector names                      | Descriptions                                                                                                                                                                                                                                                                                                                                                          |
|-----------------------------------|-----------------------------------------------------------------------------------------------------------------------------------------------------------------------------------------------------------------------------------------------------------------------------------------------------------------------------------------------------------------------|
| pPZP211- <i>pCER6::TSF</i>        | <i>CaMV35S</i> in pPZP211 was replaced by a genomic DNA fragment containing the region from 1,951 bp upstream to 1 bp upstream of the start codon of <i>CER6</i> using <i>HindIII</i> and <i>XbaI</i> sites to obtain pPZP211- <i>pCER6</i> ; then the full length coding sequence (528 bp) of <i>TSF</i> was cloned into pPZP211- <i>pCER6</i> at <i>XbaI</i> sites. |
| pPZP211- <i>pCER6::CO</i>         | The full-length coding sequence (1,122 bp) of <i>CO</i> was cloned into pPZP211- <i>pCER6</i> at <i>XbaI</i> sites.                                                                                                                                                                                                                                                   |
| pPZP211- <i>pCER6::GI</i>         | The full-length coding sequence (3,522 bp) of <i>GI</i> was cloned into pPZP211- <i>pCER6</i> at <i>XbaI</i> sites.                                                                                                                                                                                                                                                   |
| pPZP211- <i>CaMV35S::CRY2-GFP</i> | Full-length cDNA of <i>CRY2</i> (1,836 bp) was amplified by PCR and the <i>PHYB</i> moiety of pPZP211/35S- <i>PBG-nosT</i> (Matsushita et al., 2003) was replaced using <i>XbaI</i> and <i>ClaI</i> sites to obtain pPZP211- <i>CaMV35S::CRY2-GFP</i> .                                                                                                               |
