# Supplementary material
Source: PubMed Central journal article supplement (PMC3707529)
Supplement: supp_pp.113.217984_217984Table_S2.pdf [file supp_pp.113.217984_217984Table_S2.pdf]

**Supplemental Table S2.** Primer sets used in construction of transformation vectors.

| Gene names              | Forward (F)/Reverse (R) | Sequences (5' to 3')                                                                |
|-------------------------|-------------------------|-------------------------------------------------------------------------------------|
| <i>TSF</i>              | F<br>R                  | GCCTCTAGAAATATGTCTTTAAGTCGTAGAGATCCTCTTG<br>GCCTCTAGACTACGTTCTTCTTCCCCCAC           |
| <i>CO</i>               | F<br>R                  | GCCTCTAGAATTATGTTGAAACAAGAGAGTAACGACATAGG<br>GCCTCTAGATCAGAATGAAGGAACAATCCCATATCC   |
| <i>GI</i>               | F<br>R                  | GCCTCTAGATGGATGGCTAGTTCATCTTCATCTG<br>GCCTCTAGATTATTGGGACAAGGATATAGTACAGCC          |
| <i>CRY2</i>             | F<br>R                  | GCTCTAGAACTAGTATGAAGATGGACAAAAAGAC<br>CCATCGATTTTGCAACCATTTTTTCCCAAATTG             |
| <i>CER6</i><br>promoter | F<br>R                  | CCCAAGCTTCTTCGATATCGGTTGTTGACGATTAAC<br>GCCTCTAGACGTCGGAGAGTTTTAATGTATAATTGTATTATTG |
