# Supplementary material
Source: PubMed Central journal article supplement (PMC3707529)
Supplement: supp_pp.113.217984_217984Table_S3.pdf [file supp_pp.113.217984_217984Table_S3.pdf]

**Supplemental Table S3.** Primer sets used in RT-PCR analyses.

| Gene names  | Forward (F)/Reverse (R) | Sequences (5' to 3')         |
|-------------|-------------------------|------------------------------|
| <i>TSF</i>  | F                       | TTCTTGATCCTTTCACGAGGTTGG     |
|             | R                       | CCTCTGGCAGTTGAAGTAAGAG       |
| <i>FT</i>   | F                       | GACGTTCTTGATCCGTTTAATAGATCAA |
|             | R                       | CTCTCCCTCTGACAATTGTAGAAAAC   |
| <i>SOC1</i> | F                       | GCAACAAGCAGACAAGTGACTTTC     |
|             | R                       | GCTACTCTCTTCATCACCTCTTC      |
| <i>LFY</i>  | F                       | CCCAAGAAGGGTTATCTGAGG        |
|             | R                       | CTTGGTTCGTCACCTTGGTG         |
| <i>CO</i>   | F                       | ACGCCATCAGCGAGTTCC           |
|             | R                       | AAATGTATGCGTTATGGTTAATGG     |
| <i>GI</i>   | F                       | CTGTCTTTCTCCGTTGTTGTAAGTGT   |
|             | R                       | TCATTCCGTTCTTCTCTGTTGTTGG    |
| <i>CRY1</i> | F                       | CCACTGGTGCTTCTCAGATC         |
|             | R                       | GCGACCTGTTTGATCCGAAC         |
| <i>CRY2</i> | F                       | CGGTGCTACAAAAGTCGTCTTTAACC   |
|             | R                       | TCTCCAGCCCTAGTTCTTCAAATCGA   |
| <i>TUB2</i> | F                       | CATTGTTGATCTCTAAGATCCGTG     |
|             | R                       | TACTGCTGAGAACCTCTTGAG        |
