# Supplementary material
Source: PubMed Central journal article supplement (PMC3707529)
Supplement: supp_pp.113.217984_217984Table_S4.pdf [file supp_pp.113.217984_217984Table_S4.pdf]

**Supplemental Table S4.** Stomatal index (SI) in the transgenic plants and mutants.

| Genotype           |    | SI            | <i>P</i> -value (Student's <i>t</i> test) |
|--------------------|----|---------------|-------------------------------------------|
| <i>phot1 phot2</i> |    | 0.212 ± 0.020 |                                           |
| <i>CER6::TSF</i>   | #1 | 0.222 ± 0.014 | 0.5103                                    |
|                    | #2 | 0.220 ± 0.030 | 0.7296                                    |
| <i>CER6::CO</i>    | #1 | 0.206 ± 0.020 | 0.7261                                    |
|                    | #2 | 0.206 ± 0.007 | 0.6600                                    |
| <i>CER6::GI</i>    | #1 | 0.209 ± 0.019 | 0.8539                                    |
|                    | #2 | 0.213 ± 0.015 | 0.9494                                    |
| Wild-type (Col)    |    | 0.201 ± 0.008 |                                           |
| <i>tsf-1</i>       |    | 0.216 ± 0.021 | 0.3164                                    |
| <i>ft-2 tsf-1</i>  |    | 0.203 ± 0.028 | 0.9072                                    |
| Wild-type (La-0)   |    | 0.237 ± 0.013 |                                           |
| <i>co-1</i>        |    | 0.215 ± 0.010 | 0.0803                                    |
| Wild-type (Col)    |    | 0.203 ± 0.012 |                                           |
| <i>gi-1</i>        |    | 0.190 ± 0.033 | 0.5273                                    |

SI (number of stomata/total number of cells in the epidermis) was obtained using abaxial epidermis from mature rosette leaves. Data represent the means of three individuals with standard deviations (SDs). The two-tailed unpaired Student's *t* test indicates no significant differences in means (mutant plants versus corresponding background plants), and *P*-values are shown.
